# Supplementary material
Source: publisher figshare collection journal article supplement (https://springernature.figshare.com/ndownloader/files/19888049)
Supplement: Supplementary file [file 19888049]

Additional file 1: Table S1: Demographic Characteristics by Group

| Characteristic                                       | PF v1.0 General Population (including Centering) | PF v1.0 Cancer | PF v1.0 Heart | PF v1.0 Osteo-Arthritis | PF v1.0 Rheumatoid Arthritis | PF v1.0 Psychiatric Disorders | PF v 1.0 Spinal Cord Injury | PF v1.0 Limited Health | PF v2.0 General Population | PF v2.0 Poor Physical Health | Full-Bank Limited Upper Extremity Functioning | Full-Bank Non-Limited Upper Extremity Functioning | Combined Sample |
|------------------------------------------------------|--------------------------------------------------|----------------|---------------|-------------------------|------------------------------|-------------------------------|-----------------------------|------------------------|----------------------------|------------------------------|-----------------------------------------------|---------------------------------------------------|-----------------|
| Number of Participants                               | 4,982                                            | 987            | 581           | 916                     | 553                          | 1,193                         | 266                         | 557                    | 800                        | 200                          | 246                                           | 354                                               | 11,635          |
| Age -- Mean (SD)                                     | 50.6 (18.3)                                      | 62.2 (12.1)    | 61.0 (11.8)   | 61.4 (12.6)             | 56.7 (11.0)                  | 48.2 (14.9)                   | 56.3 (11.9)                 | 48.3 (13.7)            | 45.3 (16.6)                | 52.4 (15.3)                  | 47.9 (13.7)                                   | 50.2 (14.9)                                       | 52.6 (16.6)     |
| Gender -- Male -- N (%)                              | 2,124 (42.6%)                                    | 633 (64.1%)    | 397 (68.3%)   | 330 (36.0%)             | 264 (47.7%)                  | 582 (48.9%)                   | 201 (75.6%)                 | 207 (37.2%)            | 392 (49.0%)                | 70 (35.0%)                   | 76 (30.9%)                                    | 134 (37.9%)                                       | 5,410 (46.5%)   |
| Gender -- Female -- N (%)                            | 2,858 (57.4%)                                    | 354 (35.9%)    | 184 (31.7%)   | 586 (64.0%)             | 289 (52.2%)                  | 610 (51.1%)                   | 65 (24.4%)                  | 350 (62.8%)            | 408 (51.0%)                | 130 (65.0%)                  | 170 (69.1%)                                   | 220 (62.2%)                                       | 6,224 (53.5%)   |
| Race -- Caucasian -- N (%)                           | 4,020 (80.7%)                                    | 927 (93.9%)    | 531 (91.4%)   | 851 (92.9%)             | 502 (90.8%)                  | 998 (93.7%)                   | 253 (95.1%)                 | 530 (95.2%)            | 621 (77.6%)                | 172 (86.0%)                  | 218 (88.6%)                                   | 308 (87.0%)                                       | 9,931 (85.4%)   |
| Race -- African-American -- N (%)                    | 638 (12.8%)                                      | 37 (3.8%)      | 22 (3.8%)     | 40 (4.4%)               | 22 (4.0%)                    | 144 (12.1%)                   | 6 (2.3%)                    | 12 (2.2%)              | 106 (13.3%)                | 21 (10.5%)                   | 15 (6.1%)                                     | 31 (8.8%)                                         | 1,094 (9.4%)    |
| Race -- Asian-American -- N (%)                      | 48 (1.0%)                                        | 5 (0.5%)       | 9 (1.6%)      | 4 (0.4%)                | 5 (0.9%)                     | 10 (0.8%)                     | 3 (1.1%)                    | 5 (0.9%)               | 47 (5.9%)                  | 3 (1.5%)                     | 10 (4.1%)                                     | 18 (5.1%)                                         | 167 (1.4%)      |
| Race -- Native American or Alaskan Native -- N (%)   | 168 (3.4%)                                       | 21 (2.1%)      | 14 (2.4%)     | 26 (2.8%)               | 12 (2.2%)                    | 33 (2.8%)                     | 16 (6.0%)                   | 19 (3.4%)              | **                         | **                           | 4 (1.6%)                                      | 5 (1.4%)                                          | 318 (3.0%)      |
| Race -- Native Hawaiian or Pacific Islander -- N (%) | 17 (0.3%)                                        | 0 (0.0%)       | 1 (0.2%)      | 0 (0.0%)                | 2 (0.4%)                     | 3 (0.3%)                      | 0 (0.0%)                    | 2 (0.4%)               | **                         | **                           | 0 (0.0%)                                      | 2 (0.6%)                                          | 27 (0.3%)       |
| Race -- Other -- N (%)                               | **                                               | **             | **            | **                      | **                           | **                            | **                          | **                     | 38 (4.8%)                  | 6 (3.0%)                     | 4 (1.6%)                                      | 9 (2.5%)                                          | 57 (3.6%)       |
| Ethnicity -- Hispanic -- N (%)                       | 4,317 (86.7%)                                    | 957 (97.0%)    | 561 (96.6%)   | 885 (96.6%)             | 519 (93.9%)                  | 1,100 (92.2%)                 | 258 (97.0%)                 | 541 (97.1%)            | 712 (89.0%)                | 184 (92.0%)                  | 214 (87.0%)                                   | 324 (91.5%)                                       | 10,572 (91.1%)  |
| Ethnicity -- Non-Hispanic -- N (%)                   | 646 (13.0%)                                      | 29 (2.9%)      | 20 (3.4%)     | 26 (2.8%)               | 32 (5.8%)                    | 88 (7.4%)                     | 8 (3.0%)                    | 16 (2.9%)              | 88 (11.0%)                 | 16 (8.0%)                    | 32 (13.0%)                                    | 30 (8.5%)                                         | 1,031 (8.9%)    |
| Education -- Less than HS -- N (%)                   | 172 (3.5%)                                       | 11 (1.1%)      | 14 (2.4%)     | 12 (1.3%)               | 11 (2.0%)                    | 21 (1.8%)                     | 5 (1.9%)                    | 9 (1.6%)               | 89 (11.1%)                 | 17 (8.5%)                    | 6 (2.4%)                                      | 1 (0.3%)                                          | 368 (3.2%)      |
| Edu -- HS or GED -- N (%)                            | 1,033 (20.7%)                                    | 54 (5.5%)      | 64 (11.0%)    | 83 (9.1%)               | 52 (9.4%)                    | 145 (9.1%)                    | 31 (11.7%)                  | 56 (10.1%)             | 231 (28.9%)                | 47 (23.5%)                   | 53 (21.5%)                                    | 60 (17.0%)                                        | 1,909 (16.4%)   |
| Edu -- Some College -- N (%)                         | 2,085 (41.9%)                                    | 249 (25.2%)    | 208 (35.8%)   | 313 (34.2%)             | 198 (35.8%)                  | 377 (31.6%)                   | 95 (35.7%)                  | 214 (38.4%)            | 184 (23.0%)                | 79 (39.5%)                   | 81 (32.9%)                                    | 87 (24.6%)                                        | 4,170 (35.9%)   |
| Edu -- Bachelors -- N (%)                            | 1,006 (20.2%)                                    | 325 (32.9%)    | 159 (27.4%)   | 244 (26.6%)             | 161 (29.1%)                  | 356 (29.8%)                   | 70 (26.2%)                  | 160 (28.7%)            | 208 (26.0%)                | 35 (17.5%)                   | 80 (32.5%)                                    | 140 (39.6%)                                       | 2,944 (25.3%)   |
| Edu -- Advanced Degree - N (%)                       | 681 (13.7%)                                      | 348 (35.3%)    | 136 (23.4%)   | 264 (28.8%)             | 131 (23.7%)                  | 293 (24.6%)                   | 65 (24.4%)                  | 118 (21.1%)            | 88 (11.0%)                 | 22 (11.0%)                   | 26 (10.6%)                                    | 66 (18.6%)                                        | 2,238 (19.2%)   |

\*\* Not collected as part of this study

Additional file 1: Table S2: Population Distributions on the UE Item Bank

| <b>Group</b>                                      | <b>Sample Size</b> | <b>Number of Items</b> | <b>T-Score Mean</b> | <b>T-Score SD</b> |
|---------------------------------------------------|--------------------|------------------------|---------------------|-------------------|
| PF v1.0 Centering Sample ( <b>fixed</b> )         | 2,172              | 43                     | 50                  | 10.0              |
| PF v1.0 General Population                        | 2,810              | 43                     | 52                  | 9.8               |
| PF v1.0 Cancer                                    | 987                | 23                     | 52                  | 8.8               |
| PF v1.0 Heart                                     | 581                | 4                      | 46                  | 10.1              |
| PF v1.0 Osteoarthritis                            | 916                | 14                     | 42                  | 6.0               |
| PF v1.0 Rheumatoid Arthritis                      | 553                | 17                     | 45                  | 8.7               |
| PF v1.0 Psychiatric Disorders                     | 1,193              | 14                     | 47                  | 7.0               |
| PF v1.0 Spinal Cord Injury                        | 266                | 5                      | 40                  | 6.5               |
| PF v1.0 Limited Health                            | 557                | 14                     | 45                  | 8.6               |
| PF v2.0 General Population                        | 800                | 19                     | 46                  | 12.3              |
| PF v2.0 Poor Physical Function                    | 200                | 19                     | 36                  | 6.0               |
| Full-Bank Limited Upper Extremity Functioning     | 246                | 46                     | 36                  | 4.3               |
| Full-Bank Non-Limited Upper Extremity Functioning | 354                | 46                     | 49                  | 7.7               |

### Upper Extremity – Short Form 7a

Please respond to each question or statement by marking one box per row.

|         |                                                                                           | Without<br>any<br>difficulty  | With a<br>little<br>difficulty | With<br>some<br>difficulty    | With<br>much<br>difficulty    | Unable to<br>do               |
|---------|-------------------------------------------------------------------------------------------|-------------------------------|--------------------------------|-------------------------------|-------------------------------|-------------------------------|
| PFA14r1 | Are you able to carry a heavy object (over 10 pounds /5 kg)? .....                        | <input type="checkbox"/><br>5 | <input type="checkbox"/><br>4  | <input type="checkbox"/><br>3 | <input type="checkbox"/><br>2 | <input type="checkbox"/><br>1 |
| PFA34   | Are you able to wash your back? .....                                                     | <input type="checkbox"/><br>5 | <input type="checkbox"/><br>4  | <input type="checkbox"/><br>3 | <input type="checkbox"/><br>2 | <input type="checkbox"/><br>1 |
| PFA36   | Are you able to put on and take off a coat or jacket? .....                               | <input type="checkbox"/><br>5 | <input type="checkbox"/><br>4  | <input type="checkbox"/><br>3 | <input type="checkbox"/><br>2 | <input type="checkbox"/><br>1 |
| PFB13   | Are you able to carry a shopping bag or briefcase?.....                                   | <input type="checkbox"/><br>5 | <input type="checkbox"/><br>4  | <input type="checkbox"/><br>3 | <input type="checkbox"/><br>2 | <input type="checkbox"/><br>1 |
| PFB28r1 | Are you able to lift 10 pounds (5 kg) above your shoulder? .....                          | <input type="checkbox"/><br>5 | <input type="checkbox"/><br>4  | <input type="checkbox"/><br>3 | <input type="checkbox"/><br>2 | <input type="checkbox"/><br>1 |
| PFB34   | Are you able to change a light bulb overhead? .....                                       | <input type="checkbox"/><br>5 | <input type="checkbox"/><br>4  | <input type="checkbox"/><br>3 | <input type="checkbox"/><br>2 | <input type="checkbox"/><br>1 |
| PFM16   | Are you able to pass a 20-pound (10 kg) turkey or ham to other people at the table? ..... | <input type="checkbox"/><br>5 | <input type="checkbox"/><br>4  | <input type="checkbox"/><br>3 | <input type="checkbox"/><br>2 | <input type="checkbox"/><br>1 |

# PROMIS Upper Extremity Short Form 7a

## Sum Score Conversion Table

All questions must be answered in order to produce a valid score using the scoring tables. If a participant has skipped a question, use the HealthMeasures Scoring Service ([https://www.assessmentcenter.net/ac\\_scoring-service](https://www.assessmentcenter.net/ac_scoring-service)) to generate a final score.

| Raw<br>Sum Score | T-Score | SD  |
|------------------|---------|-----|
| 7                | 16.3    | 3.0 |
| 8                | 19.3    | 2.7 |
| 9                | 21.1    | 2.5 |
| 10               | 22.6    | 2.4 |
| 11               | 23.9    | 2.4 |
| 12               | 25.0    | 2.3 |
| 13               | 26.1    | 2.3 |
| 14               | 27.0    | 2.3 |
| 15               | 27.9    | 2.3 |
| 16               | 28.8    | 2.3 |
| 17               | 29.7    | 2.3 |
| 18               | 30.5    | 2.3 |
| 19               | 31.4    | 2.3 |
| 20               | 32.2    | 2.3 |
| 21               | 33.0    | 2.3 |
| 22               | 33.9    | 2.3 |
| 23               | 34.7    | 2.4 |
| 24               | 35.6    | 2.4 |
| 25               | 36.6    | 2.5 |
| 26               | 37.5    | 2.6 |
| 27               | 38.6    | 2.6 |
| 28               | 39.7    | 2.8 |
| 29               | 40.9    | 2.9 |
| 30               | 42.3    | 3.1 |
| 31               | 43.9    | 3.4 |
| 32               | 45.6    | 3.6 |
| 33               | 47.7    | 3.9 |
| 34               | 50.9    | 4.5 |
| 35               | 58.2    | 6.7 |
